# Supplementary material
Source: publisher figshare collection journal article supplement (https://acs.figshare.com/ndownloader/files/31621162)
Supplement: Supplementary file 1 [file 31621162]

## Supporting information

### Polyphenol-Metal Ion Redox-Induced Gelation System for Constructing Plant Protein Adhesives with Excellent Fluidity and Cold-Pressing Adhesion

Huiwen Pang<sup>a</sup>, Qian Yan<sup>a</sup>, Chao Ma<sup>a</sup>, Shifeng Zhang<sup>a\*</sup>, Zhenhua Gao<sup>b\*</sup>

<sup>a</sup> MOE Key Laboratory of Wooden Material Science and Application and Key Laboratory of Wood Science and Engineering, Beijing Forestry University, Beijing 100083, P.R. China

<sup>b</sup> MOE Key Laboratory of Bio-based Material Science and Technology, Northeast Forestry University, Harbin 150040, P.R. China

\* Corresponding author: shifeng.zhang@bjfu.edu.cn (Shifeng Zhang); gaozh1976@163.com (Zhenhua Gao)

## Introduction

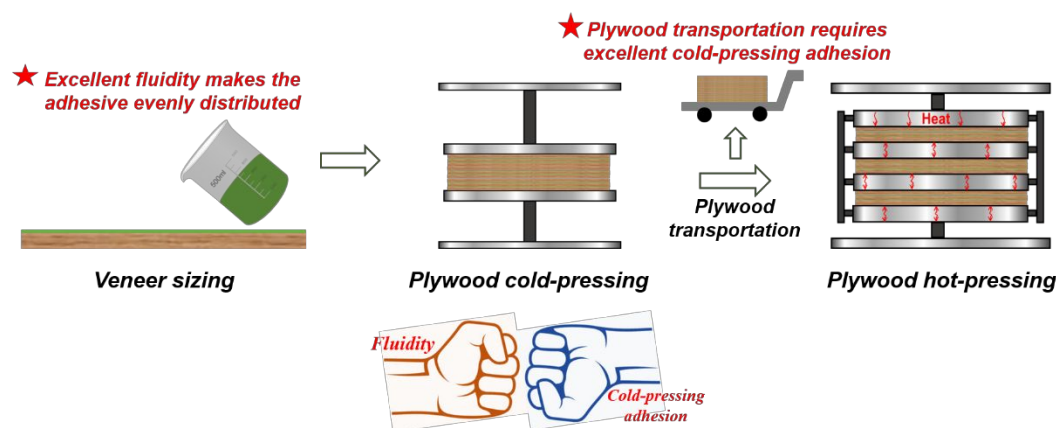

Figure S1. The practical production problems of the plywood bonded by the SP adhesive.

## Experimental Procedures

### Cold-pressing bonding strength of adhesives

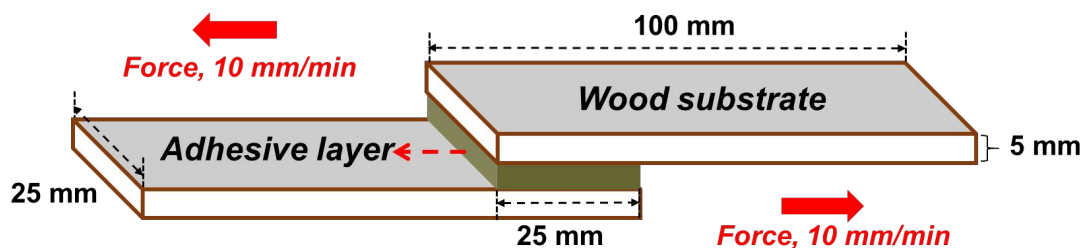

Scheme S1. Detailed test process of lap shear strength.

## Hot-pressing bonding strength of adhesives

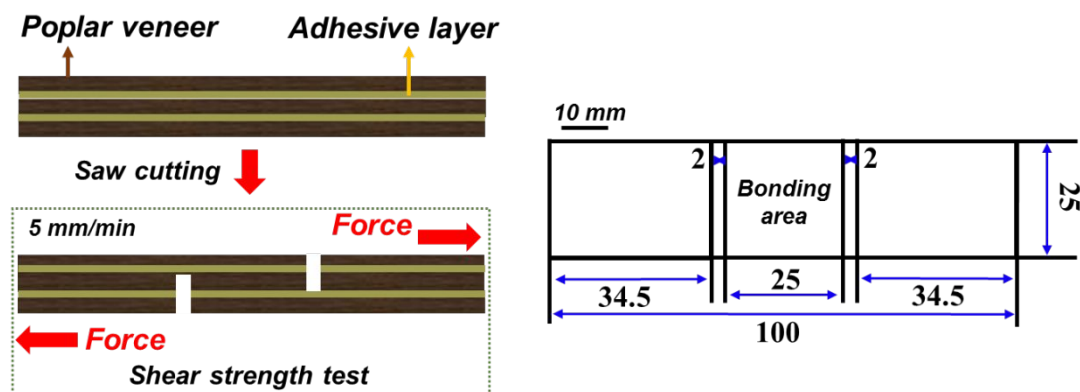

Scheme S2. Detailed dimensions of the plywood specimens.

## Characterization

The ultraviolet-visible (UV-Vis) spectra of samples were measured with a UV-Vis spectrophotometer (TU-1901, Purkinje General, China) from 300 to 600 nm. The morphologies of the cured SP-based adhesives were observed by scanning electron microscopy (SEM) (Hitachi Ltd., Tokyo, Japan) coupled with energy-dispersive X-ray spectroscopy (EDX) at an acceleration voltage of 5 kV. The cured SP-based adhesives were analyzed by Fourier transform infrared (FT-IR) spectroscopy using the attenuated total reflection (ATR) sampling technique performed on a Thermo Scientific Nicolet 6700 spectrometer (Thermo Fisher Scientific Inc., Waltham, MA, USA) over a spectral range of 600–4,000  $\text{cm}^{-1}$  with 4  $\text{cm}^{-1}$  resolution. The internal structure of the cured SP-based adhesives was examined by X-ray photoelectron spectroscopy (XPS) (Thermo Escalab 250, Thermo Fisher Scientific Inc.) with Al K $\alpha$  radiation. Thermogravimetric analysis (TGA) was performed using an A TA Q50 thermogravimetric analyzer (Waters Corporation, Milford, MA, USA) to measure changes in the weight of the plywood samples over the temperature range of 10–250°C at a heating rate of 10°C/min. The tensile strength of the adhesive hydrogels and the bonding strength of the adhesives using a Shimadzu AGS-X tensile tester (Shimadzu Scientific Instruments Inc., Columbus, MD, USA), and the tensile strength of the adhesive hydrogels (100 mm  $\times$  25 mm) was tested at a crosshead speed of 1 mm/min. The rheological behavior of the SP-based adhesive gels was investigated on an Anton Paar MCR 302 rheometer (Anton Paar GmbH, Graz, Austria) equipped with a flat parallel plate. An oscillatory sweep was used over a frequency range from 0.1 to 100 rad/s at  $\gamma = 1\%$  of the fixed strain amplitude. A FLIR T540 handheld thermal imaging camera (FLIR Systems Inc., Wilsonville, OR, USA) was used to record the temperature changes during SP-based adhesive gelation. The electron paramagnetic resonance (EPR) spectra were acquired on a Bruker EMX plus 10/12 spectrometer (Bruker Biospin GmbH, Rheinstetten, Germany) to observe the mechanism of the TA-Fe<sup>3+</sup>/persulfate system. Reaction conditions were  $m(\text{TA}) = 0.01$  g,  $m(\text{FeCl}_3) = 0.3$  g,  $m(\text{APS}) = 0.75$  g,

m(water) = 17.5 g. TA, FeCl<sub>3</sub>, with APS mixed firstly and DMPO added to the mixture.

Results and discussion

TA@Fe<sup>3+</sup> complex-induced in-situ gelation of SP-based adhesives

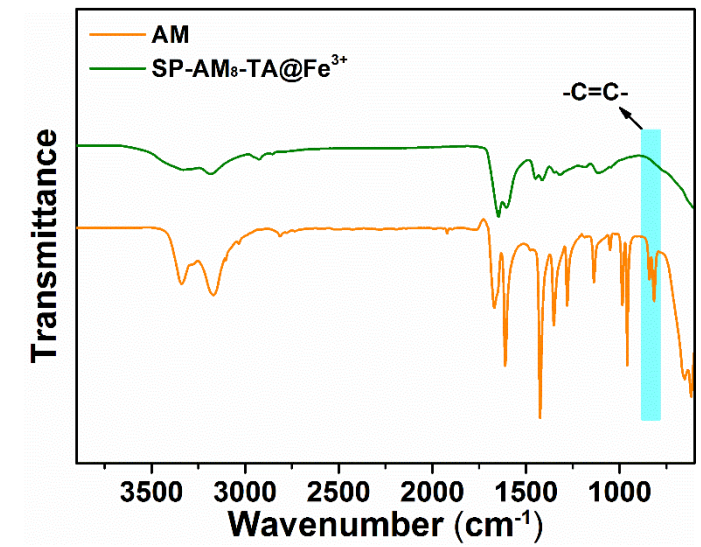

Figure S2. FTIR spectra of the AM and SP-AM<sub>8</sub>-TA@Fe<sup>3+</sup> adhesives.

Cold-pressing bonding strength of SP-based adhesives

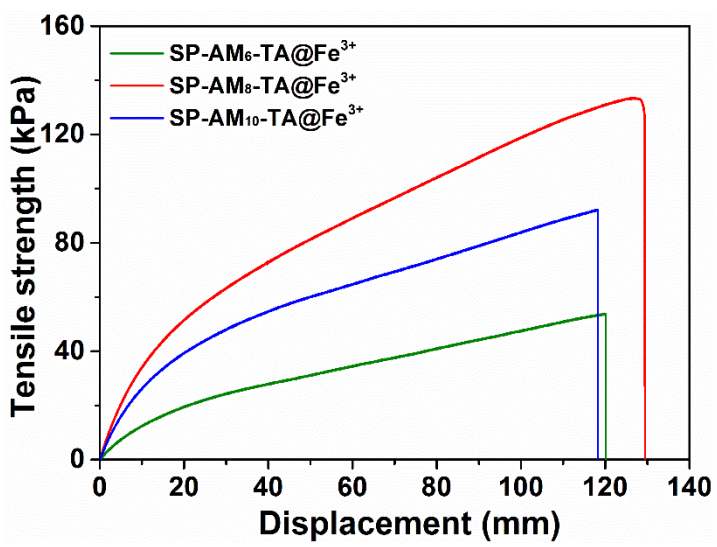

Figure S3. Tensile strength of the SP-AM-TA@Fe<sup>3+</sup> adhesive hydrogels.

Investigation of SP-based adhesive bonding mechanism

Table S1. Content of atoms of SP-based adhesives

| Sample | Content of atoms (%) |   |   |
|--------|----------------------|---|---|
|        | C                    | O | N |

|                           |       |       |      |
|---------------------------|-------|-------|------|
| SP                        | 72.42 | 22.64 | 4.94 |
| SP-AM                     | 70.99 | 23.18 | 5.83 |
| SP-AM-TA@Fe <sup>3+</sup> | 74.13 | 24.63 | 1.24 |

## Hot-pressing bonding strength of SP-based adhesives

**Table S2.** Comparison of hot-pressing bonding strength between the three-ply plywood bonded by the adhesives prepared in this work and that bonded by other reported adhesive samples.

| Sample                    | Dry bonding strength (MPa) | Wet bonding strength (MPa) | Reference |
|---------------------------|----------------------------|----------------------------|-----------|
| UF                        | 1.80                       | 1.02                       | 1         |
| SP-MG-EPR                 | 2.16                       | 0.91                       | 2         |
| SF-WPU                    | 1.66                       | 1.10                       | 3         |
| SP/TCA-HBSi               | 3.77                       | 1.45                       | 4         |
| SM/AC@CNF-PA              | 1.80                       | 1.19                       | 5         |
| SP-HBPE-SB                | 1.94                       | 0.90                       | 6         |
| SP-PUSD                   | 3.03                       | 1.74                       | 7         |
| SPI/TGA/A-SSPS            | 1.78                       | 1.07                       | 8         |
| SP-AM-TA@Fe <sup>3+</sup> | 1.40                       | 1.28                       | This work |

## Mildew resistance and biodegradability of SP-based adhesives

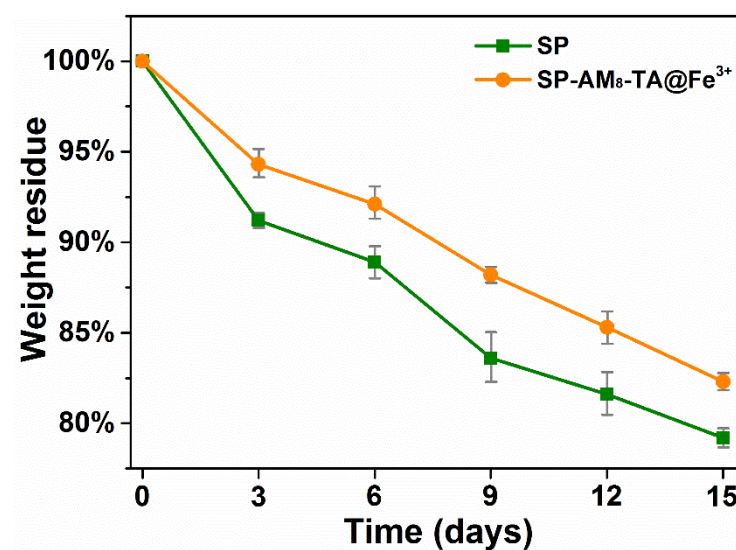

**Figure S4.** The biodegradation rates of the SP and SP-AM<sub>8</sub>-TA@Fe<sup>3+</sup> adhesive.

## Reference

1. Han-Seung Yang, D.-J. K., Hyun-Joong Kim, Rice Straw–Wood Particle Composite for Sound Absorbing Wooden Construction Materials. *Bioresource Technology* **2003**, *86* (2), 117-121.
2. Wu, Z.; Lei, H.; Cao, M.; Xi, X.; Liang, J.; Du, G., Soy-Based Adhesive Cross-linked by Melamine–Glyoxal and Epoxy Resin. *Journal of Adhesion Science and Technology* **2016**, *30* (19), 2120-2129.
3. Wang, Y.; Fan, Y.; Deng, L.; Li, Z.; Chen, Z., Properties of Soy-Based Wood Adhesives Enhanced by Waterborne Polyurethane Modification. *Journal of Biobased Materials and Bioenergy* **2017**, *11* (4), 330-335.
4. Wang, Z.; Zhao, S.; Pang, H.; Zhang, W.; Zhang, S.; Li, J., Developing Eco-friendly High-Strength Soy Adhesives with Improved Ductility through Multiphase Core–Shell Hyperbranched Polysiloxane. *ACS Sustainable Chemistry & Engineering* **2019**, *7* (8), 7784-7794.
5. Jin, S.; Li, K.; Zhang, X.; Gao, Q.; Zeng, L.; Shi, S. Q.; Li, J., Phytic Acid-Assisted Fabrication for Soybean Meal/Nanofiber Composite Adhesive via Bioinspired Chelation Reinforcement Strategy. *J Hazard Mater* **2020**, *399*, 123064.
6. Gu, W. D.; Li, F.; Liu, X. R.; Gao, Q.; Gong, S. S.; Li, J. Z.; Shi, S. Q. Q., Borate Chemistry Inspired by Cell Walls Converts Soy Protein into High-Strength, Antibacterial, Flame-Retardant Adhesive. *Green Chemistry* **2020**, *22* (4), 1319-1328.
7. Zhao, S.; Pang, H.; Li, Z.; Wang, Z.; Kang, H.; Zhang, W.; Zhang, S.; Li, J.; Li, L., Polyurethane as High-Functionality Crosslinker for Constructing Thermally Driven Dual-Crosslinking Plant Protein Adhesion System with Integrated Strength and Ductility. *Chemical Engineering Journal* **2021**, *422*, 130152.
8. Zhang, Y.; Zhang, M.; Chen, M.; Luo, J.; Li, X.; Gao, Q.; Li, J., Preparation and Characterization of a Soy Protein-Based High-Performance Adhesive with a Hyperbranched Cross-linked Structure. *Chemical Engineering Journal* **2018**, *354*, 1032-1041.
